# Supplementary material for: A Microarray Study of Carpet-Shell Clam (Ruditapes decussatus) Shows Common and Organ-Specific Growth-Related Gene Expression Differences in Gills and Digestive Gland
Source: PubMed Central journal article supplement (PMC5712350; doi:10.3389/fphys.2017.00943), 2017-11-28

## ***Supplementary Presentation.- Figures S1 and S2***

**A microarray study of carpet-shell clam (*Ruditapes decussatus*) shows common and organ-specific growth-related gene expression differences in gills and digestive gland.**

Carlos Saavedra, Massimo Milan, Ricardo B. Leite, David Cordero, Tomaso Patarnello, Leonor Cancela and Luca Bargelloni

### Figure captions

**Figure S1.** Results of average linkage clustering based on Pearson correlation coefficients for the gill and the digestive gland expression data.

**Figure S2.** Results of the principal component analysis of the expression data in gills and digestive gland. Only the plots corresponding to the three first components are shown.

**Fig. S1**

Gill

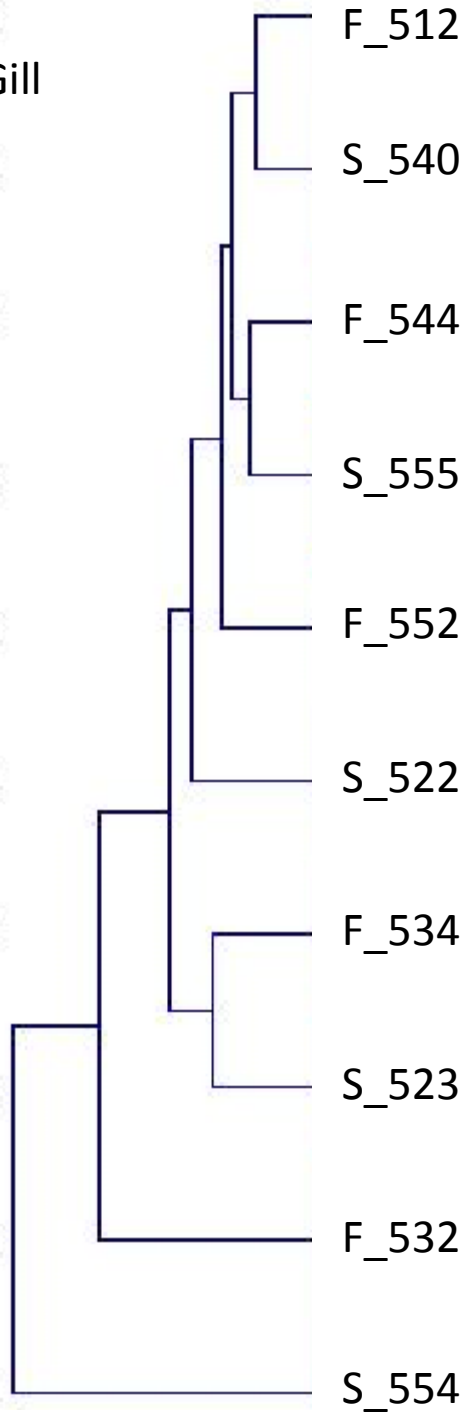

Digestive Gland

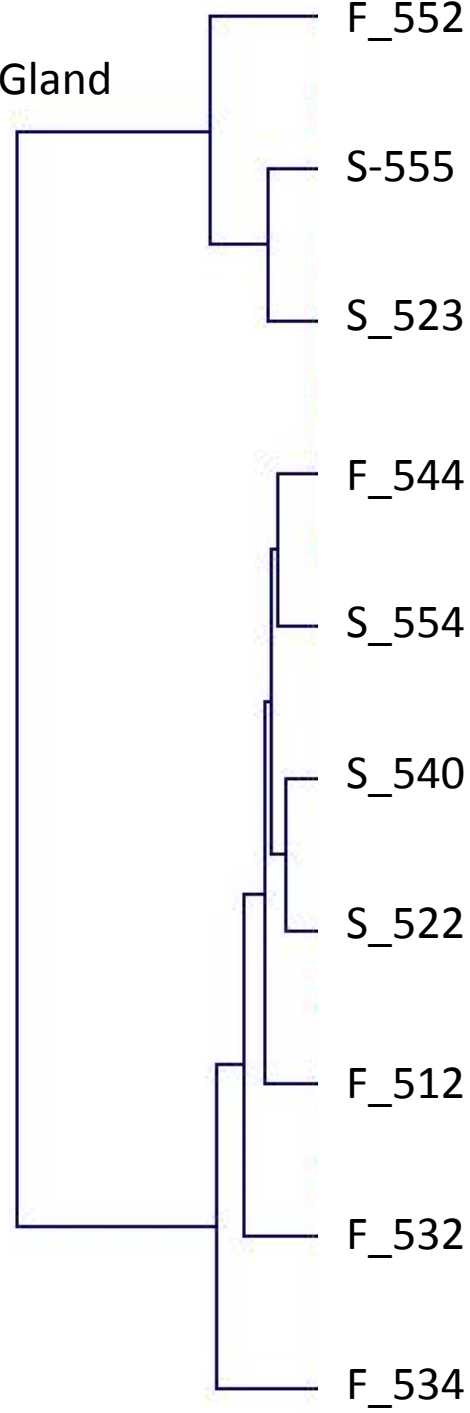

Fig. S2

Gills

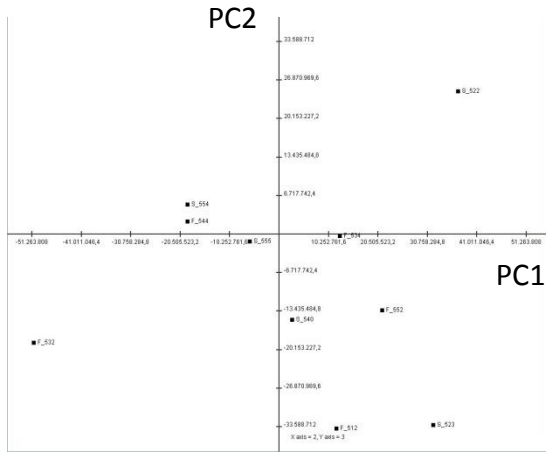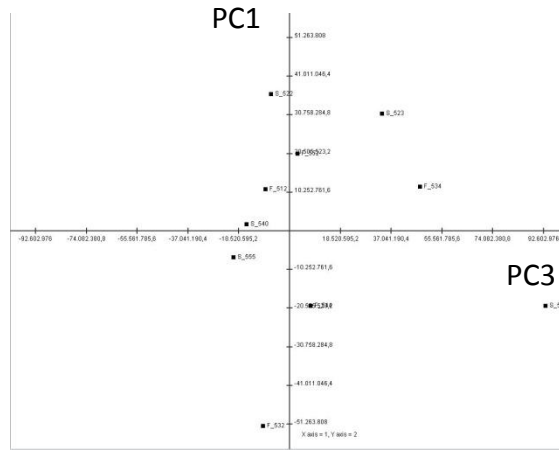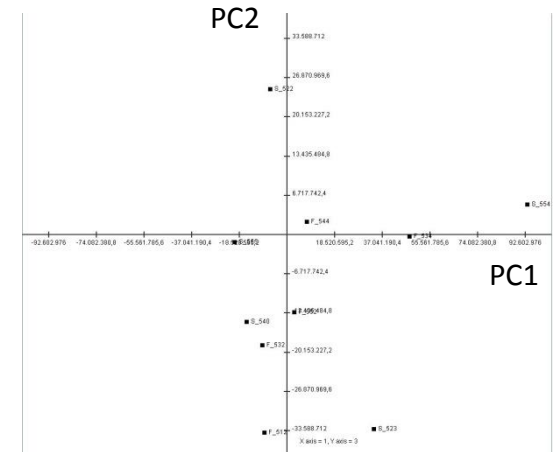

Digestive gland

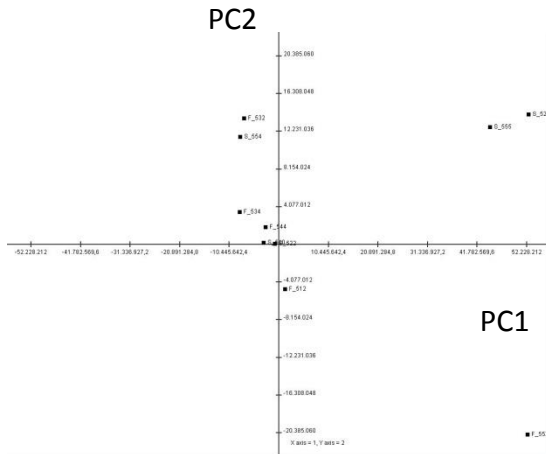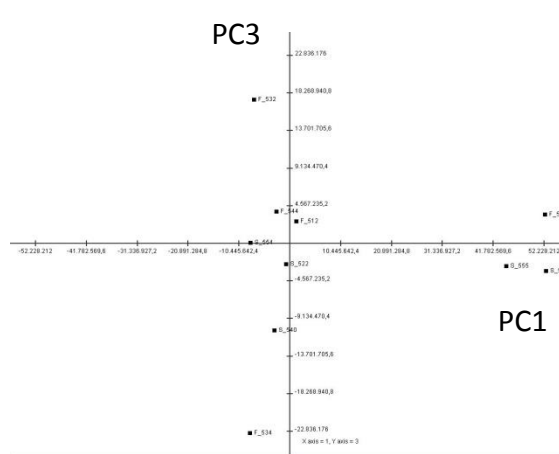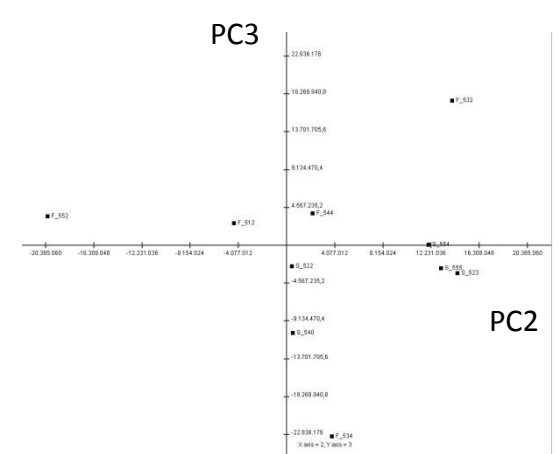

Supplement: Presentation1.pdf [file Presentation1.pdf]
